1     **Prediction of high-risk liver cancer patients from their mutation**  
2             **profile: Benchmarking of mutation calling techniques**

3  
4             Sumeet Patiyal<sup>#</sup>, Anjali Dhall<sup>#</sup>, Gajendra P. S. Raghava<sup>\*</sup>

5     Department of Computational Biology, Indraprastha Institute of Information Technology,  
6             Okhla Phase 3, New Delhi-110020, India.

7     **Emails of Authors:**

8     Sumeet Patiyal: [sumeetp@iiitd.ac.in](mailto:sumeetp@iiitd.ac.in)             ORCID ID: <https://orcid.org/0000-0003-1358-292X>

9     Anjali Dhall: [anjolid@iiitd.ac.in](mailto:anjolid@iiitd.ac.in)             ORCID ID: <https://orcid.org/0000-0002-0400-2084>

10    Gajendra P. S. Raghava: [raghava@iiitd.ac.in](mailto:raghava@iiitd.ac.in)     ORCID ID: <https://orcid.org/0000-0002-8902-2876>

11  
12    <sup>#</sup> **Equal Contribution**

13  
14    <sup>\*</sup> **Corresponding author**

15    Prof. G.P.S. Raghava,

16    Head of Department, Department of Computational Biology, Indraprastha Institute of  
17    Information Technology, Okhla Phase 3, New Delhi-110020, India.

18    E-mail address: [raghava@iiitd.ac.in](mailto:raghava@iiitd.ac.in)

19    Phone No: +91-11-26907444

20

21 **Abstract**

22

23 Identification of somatic mutations with high precision is one of the major challenges in  
24 prediction of high-risk liver-cancer patients. In the past, number of mutation calling  
25 techniques have been developed that include MuTect2, MuSE, Varscan2, and SomaticSniper.  
26 In this study, an attempt has been made to benchmark potential of these techniques in  
27 predicting prognostic biomarkers for liver cancer. Initially, we extracted somatic mutations in  
28 liver-cancer patients using VCF and MAF files from the cancer genome atlas. In terms of  
29 size, the MAF files are 42 times smaller than VCF files and containing only high-quality  
30 somatic mutations. Further, machine learning based models have been developed for  
31 predicting high-risk cancer patients using mutations obtain from different techniques. The  
32 performance of different techniques and data files have been compared based on their  
33 potential to discriminate high and low risk liver-cancer patients. Finally, univariate survival  
34 analysis revealed the prognostic role of highly mutated genes. Based on correlation analysis,  
35 we selected 80 genes negatively associated with the overall survival of the liver cancer  
36 patients. Single-gene based analysis showed that MuTect2 technique based MAF file has  
37 achieved maximum  $HR_{LAMC3}$  9.25 with p-value 1.78E-06. Further, we developed various  
38 prediction models using selected genes for each technique, and the results indicate that  
39 MuTect2 technique based VCF files outperform all other methods with maximum AUROC  
40 of 0.72 and HR 4.50 (p-value 3.83E-15). Eventually, VCF file generated using MuTect2  
41 technique performs better among other mutation calling techniques to explore the prognostic  
42 potential of mutations in liver cancer. We hope that our findings will provide a useful and  
43 comprehensive comparison of various mutation calling techniques for the prognostic analysis  
44 of cancer patients.

45

46 **Keywords:** Mutation calling techniques; Prognosis; Liver cancer; Survival analysis; Machine  
47 learning; Regression

48

## 49 **Introduction**

50 According to the world health organization, cancer is a life-threatening disease and the first  
51 leading cause of death worldwide in 2019. Global cancer statistics estimate that in 2020, 19.3  
52 million new cases and 10 million deaths have been occurred due to cancer [1]. Cancer is  
53 extremely heterogeneous; therefore, the same treatment strategy is not effective for  
54 individuals with similar types of cancer. Till now, there is no universal treatment available  
55 for all types of malignancies. Currently, several targeted therapies are available for cancer  
56 treatment, which majorly focus on the detection of mutations at the genetic level [2]. In the  
57 last few years, several therapies have been designed based on the mutated genes for the  
58 cancer treatment. For instance, B-Raf Proto-Oncogene, Serine/Threonine Kinase (BRAF)  
59 inhibitors (Sorafenib) is identified to treat melanoma patients with V600E mutation in the  
60 BRAF gene [3, 4]. However, drugs like afatinib and erlotinib are used to target the mutation  
61 in the EGFR in non-small-cell lung cancer [5, 6]. Moreover, BRCA1/BRCA2 gene mutations  
62 in ovarian cancer patients have been treated by poly (ADP-ribose) polymerase (PARP)  
63 inhibitor, i.e., olaparib [7]. Of note, research on the mutations associated with the genes in  
64 cancer patients is essential for identifying the correct mechanism of the disease. Due to the  
65 advancements in next-generation sequencing, such as whole-genome, whole-exome, and  
66 mutation calling techniques, the detection of more than 98% mutations associated with the  
67 disease using sequencing data is possible [8, 9]. The easy availability and low cost of next-  
68 generation sequencing techniques enable researchers to perform experiments on large cohorts  
69 of cancer patients [10].

70 The genetic variants are mainly categorised into single nucleotide variant (SNV),  
71 insertion/deletion (indel), and structural variants (SV, which incorporates copy number  
72 alterations, duplications, and translocations). In recent years, a huge number of somatic  
73 mutation calling algorithms (for example, Mutect2, VarScan2, SomaticSniper, MuSE,  
74 Strelka2, etc.) have been developed to identify mutations at the genetic level using  
75 sequencing data [11-17]. Mutect2 calls somatic mutation such as single nucleotide alterations  
76 and indels using the local assembly of haplotypes. SomaticSniper pipeline detects somatic  
77 SNVs using Bayesian algorithm to compare the genotype likelihoods in the tumor and normal  
78 samples. However, VarScan2 mutation calling algorithm uses exomes, whole-genome  
79 sequencing data to capture germline variants, somatic mutations and copy number variants in  
80 tumor-normal data. Moreover, MuSE is a Markov Substitution model for Evolution, to  
81 identify novel mutations in the large-scale tumor sequencing data.

82 Liver cancer is one of the deadliest disease which is the seventh most common cancer among  
83 the 36 cancers reported by Global Cancer Statistics 2020 [1]. Ample treatment methods were  
84 developed in the past, but still the survival rate of liver cancer patients is very low, leading to  
85 high-mortality rate [18]. Being the most comprehensive resource for the cancer related  
86 research, TCGA provides two types of file formats for mutation data such as Variant Call  
87 Format (VCF) and Mutation Annotation Format (MAF). VCF files are the raw mutation files  
88 that store and report the genomic sequence variations that directly came out of the various  
89 automated variant calling pipelines. On the other hand, MAF files are the processed version  
90 of the VCF files, which are curated by removing the false positives or by recovering the  
91 known calls that the automated pipelines may have missed. VCF files report mutations  
92 irrespective of their importance, but MAF files describe only the most affected ones by  
93 removing the low-quality mutations. In GDC portal, both type of files are available generated  
94 using the four major mutation calling techniques named as MuTect2, MuSE, Varscan2, and  
95 SomaticSniper. Despite number of techniques are available, it is difficult to understand which  
96 method and file is better to explore the role of mutations in cancer.

97 In the current study, we have systematically evaluated the four mutation calling tools which  
98 are widely used in TCGA, to identify highly mutated genes associated with high-risk liver  
99 cancer patients. For this, we have collected VCF and MAF files of 418 liver cancer patients  
100 for all the mutation calling techniques. The gene-based annotations were identified using  
101 highly accurate and widely used methods ANNOVAR [19] and Maftools [20]. Correlation  
102 and survival analysis is performed to identify mutated genes that can impact the survival of  
103 liver cancer patients. Finally, several prediction algorithms have been developed for the top  
104 genes. The inferences of our study can give a valuable reference and guidance to the  
105 researchers to choose a reliable somatic mutation algorithm to determine the mutation-  
106 associated genes having a significant impact on the survival of the cancer patients.

107

## 108 **Material and Methods**

109

### 110 **Dataset Collection**

111 We obtained liver cancer (TCGA-LICH and TCGA-CHOL) mutation data from Genome  
112 Data Commons (GDC) data portal. Precisely, we collected the controlled access VCF of liver  
113 cancer patients under the approval of dbGap (Project No. 17674) according to the GDC  
114 protocols [21]. In addition to that, we have also downloaded the MAF files of TCGA liver  
115 cancer patients. In TCGA, four different techniques are used for mutation calling, i.e., MuSE,

116 Mutect2, VarScan2, and SomaticSniper. In this study, we have utilized VCF and MAF files of  
117 418 liver cancer samples generated from four different mutation calling methods. Moreover,  
118 the clinical data like age, gender, tumor stage, overall survival (OS) time, and vital status  
119 were collected using TCGA assembler 2 [22].

120

### 121 **Mutation Annotations**

122 We used the ANNOVAR software package  
123 (<https://annovar.openbioinformatics.org/en/latest/>) for functional annotations of genetic  
124 variant mutations. First, we convert VCF files into ANNOVAR genetic variants file; using  
125 “convert2annovar.pl” script; the processed file contains five major columns such as  
126 chromosome number, start position, end position, reference nucleotide, and altered  
127 nucleotides. It provides three major type of annotations (i.e., gene-based, region-based, and  
128 filter-based annotations). In this work, we used gene-based annotations, in which we obtained  
129 mutations/gene/samples. In this way, we get per-gene mutations for each sample for the four  
130 different mutation calling techniques. After that, we count number of mutations per gene for  
131 each liver cancer patient with the help of in-house python script (gene\_to\_matrix.py).  
132 Similarly, for MAF files we counted the number of mutations/gene/samples. Finally, we  
133 generated matrices for each mutation calling technique from VCF and MAF files, in which  
134 number of mutations per gene per sample were reported.

135

### 136 **Correlation Analysis**

137 To understand the impact of number of genetic mutations on overall survival (OS) of liver  
138 cancer patients, we have implemented correlation test. After that, we removed the genes with  
139 the non-significant p-value i.e.,  $>0.05$ , and ranked the remaining genes on the bases of  
140 correlation coefficients. We choose top-10 negatively correlated genes from each technique  
141 for VCF and MAF files for further analysis.

142

### 143 **Survival Analysis**

144 In this study, we have performed survival analysis by the ‘survival’ package in R (V.3.5.1)  
145 using cox proportional hazard (Cox PH) model. We perform univariate survival, in order to  
146 understand the impact of per gene mutations on the survival of liver cancer patients. The log-  
147 rank test was used to estimate the significant survival distributions between high-risk and  
148 low-risk groups in terms of the p-value. Kaplan-Meier (KM) survival curves were used for  
149 the graphical representation of high-risk and low-risk groups [23].

150

## 151 **Machine learning Techniques**

### 152 **Classification Models**

153 In this study, we have implemented various machine learning techniques for the classification  
154 of high-risk and low-risk samples based on the number of mutations in the chosen genes.  
155 Classification algorithms includes Decision tree (DT), Support Vector Classifier (SVC),  
156 Random Forest (RF), XGBoost (XGB), Gaussian Naive Bayes (GNB), Logistic Regression  
157 (LR), k-nearest neighbors (KNNs) and ExtraTree (ET) using Scikit learn [24].

158

### 159 **Regression Models**

160 Further, we implemented several regressors to develop regression models for overall survival  
161 time prediction in liver cancer patients. These techniques were developed using python-  
162 library scikit-learn and includes Random Forest (RF), Ridge, Lasso, Decision Tree (DT),  
163 Elastic Net (ENR), Logistic Regression (LR), and Support Vector Regression (SVR)[24].

164

## 165 **Performance Evaluation**

166

### 167 **Cross-Validation Technique**

168 To avoid over-optimization in the machine learning models, we have used standard five-fold  
169 cross-validation technique [25, 26]. In case of classification, the complete dataset was divided  
170 into 80:20 ratio, the five-fold cross-validation was performed on the 80% training dataset. In  
171 this method, the training dataset split-up into five equal sets. However, four sets used for  
172 training and remaining set used for the testing purpose. The similar task was repeated for at  
173 least five times, so that every set can be used in training and testing. Finally, the performance  
174 or outcome computed by taking the mean of all five sets. The similar process was repeated  
175 for the cross validation of regression models. In this the complete dataset was used for the  
176 five-fold cross validation.

177

### 178 **Performance Measure Parameters**

179 To evaluate the performance of classification models, we have used standard parameters. We  
180 have calculated threshold-dependent such as sensitivity (Sens), specificity (Spec), accuracy  
181 (Acc), F1-score, and MCC, and independent parameters like Area Under the Receiver  
182 Operating Characteristic (AUROC). These parameters were calculated using the following  
183 equations (1-5).

184

$$Sensitivity = \frac{P_T}{P_T + N_F} \times 100 \quad [1]$$

$$Specificity = \frac{N_T}{N_T + P_F} \times 100 \quad [2]$$

$$Accuracy = \frac{P_T + N_T}{P_T + P_F + N_T + N_F} \times 100 \quad [3]$$

$$F1 - score = \frac{2P_T}{2P_T + N_F + N_P} \quad [4]$$

$$Matthews Correlation Coefficient = \frac{(P_T * N_T) - (P_F * N_F)}{\sqrt{(P_T + P_F)(P_T + N_F)(N_T + P_F)(N_T + N_F)}} \quad [5]$$

185

186 **P<sub>T</sub> =True Positive, P<sub>F</sub> =False Positive, N<sub>T</sub> =True Negative, N<sub>F</sub> =False Negative**

187

188 Similarly, to evaluate the regression models, we have used parameters such as mean absolute  
189 error (MAE), root mean-square error (RMSE), correlation coefficient (R), and p-value, to  
190 evaluate the performance of regression models as previously used in different studies [27-29].

191

## 192 **Results**

193 In this study, we have used 418 TCGA liver cancer patients somatic mutation data (VCF files  
194 and MAF files) and OS data. The mutation data were taken from four different mutation  
195 calling techniques i.e., MuSE, Mutect2, Varscan2 and SomaticSniper. ANNOVAR software  
196 and in-house scripts were used to extract the number of mutations/gene/samples from the  
197 VCF and MAF files. The total number of genes and mutations extracted from different  
198 techniques is shown in Table 1. Where, in VCF files Mutect2 and SomaticSniper reported the  
199 highest number of genes and mutation counts i.e., more than 25000 genes and 5 million  
200 mutations. On the other hand, in MAF files the reported number of genes and mutations is  
201 comparatively less for each technique.

202

203 **Table 1: Total number of genes and mutations for each gene extracted from VCF and**  
204 **MAF files using different mutation calling technique**

| File Type | Technique     | Number of Genes | Number of Mutations |
|-----------|---------------|-----------------|---------------------|
| VCF       | MuTect2       | 25366           | 5237093             |
|           | MuSE          | 19425           | 379368              |
|           | Varscan2      | 19422           | 576231              |
|           | SomaticSniper | 25785           | 5003969             |
| MAF       | MuTect2       | 16474           | 59741               |

|  |               |       |       |
|--|---------------|-------|-------|
|  | MuSE          | 15712 | 51184 |
|  | Varscan2      | 15950 | 54877 |
|  | SomaticSniper | 14979 | 44102 |

205

206 Further, in order to understand the distribution of genes in each technique, we developed  
 207 upset plot as shown in Figure 1. For the visualization of intersecting genes set we have  
 208 created UpSet plot [30]. According to the plots, in VCF file 18758 genes were common in all  
 209 the four techniques, whereas 182, 5, 2, and 630 genes are uniquely reported by MuTect2,  
 210 MuSE, Varscan2, and SomaticSniper technique, respectively. Similarly, in case of MAF files  
 211 14585 genes were shared by all the techniques, while 461 genes are unique in file by  
 212 MuTect2 technique, 73 by MuSE, 115 by Varscan2, and 41 unique genes were reported by  
 213 SomaticSniper technique.

214

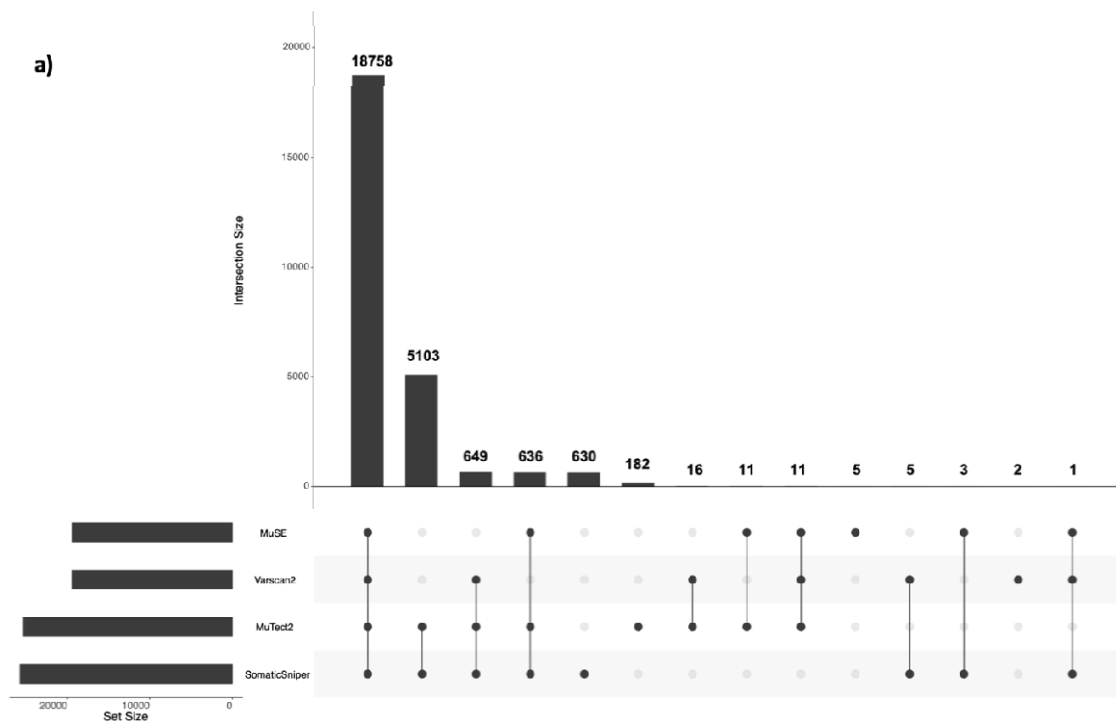

215



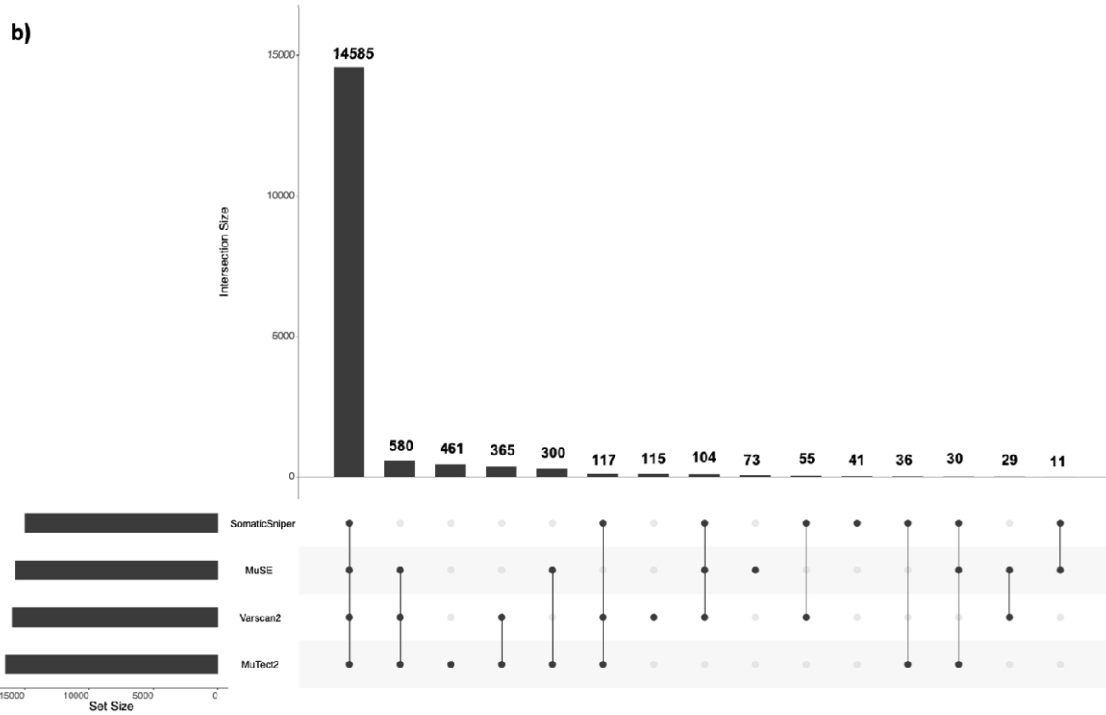

**Figure 1: Upset-plot for distribution of genes in four techniques. a) From VCF files b) From MAF files**

### Comparison of Different MAF files

To compare different mutation calling techniques, we have taken processed and annotated MAF files from TCGA. We utilized the Maftools package to comprehensively analyse the somatic variants extracted from MuSE, Mutect2, VarScan2, and SomaticSniper mutation calling technique. From the analysis, we observed few changes in the mutation calling techniques for the same cohort of samples. For example, MuSE and SomaticSniper MAF files (Figure 2A, 2B) only report SNPs on the other side VarScan2, and MuTect2 (Figure 2C, 2D) represent SNPs, INS, and DEL under the variant type.

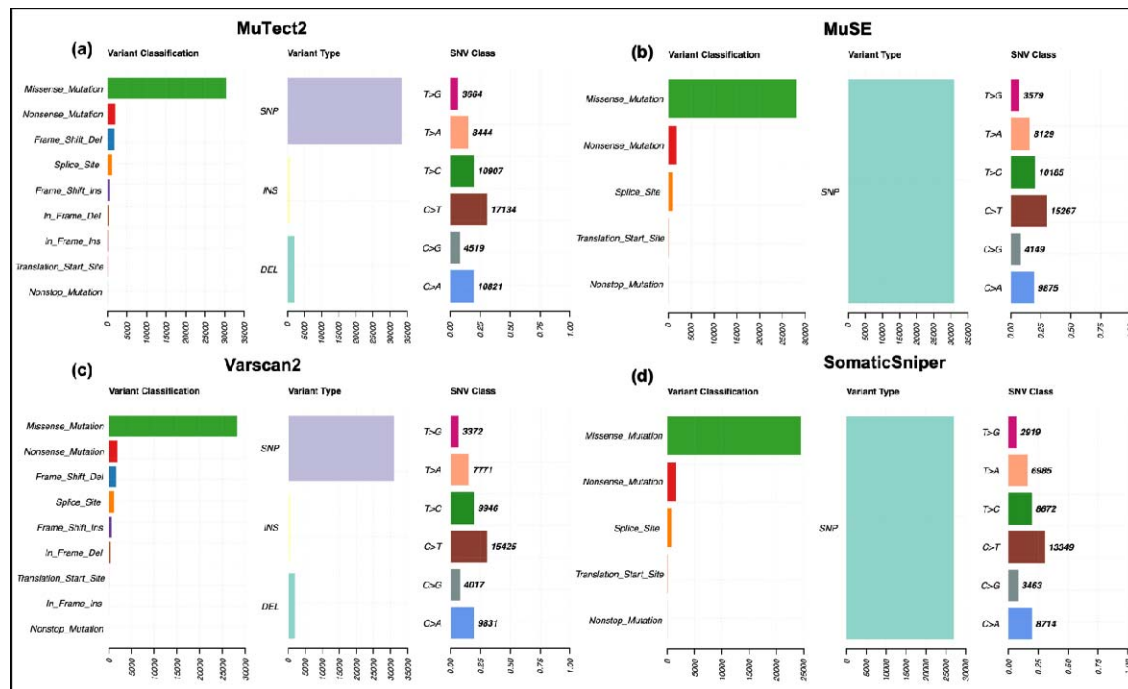

229

230 **Figure 2: Visualization of mutation summary (variants classification, type and SNVs) for MuTect2,**  
 231 **MuSE, Varscan2 and SomaticSniper MAF files**

232

233 In Varscan2 and MuTect2, the variant classification distribution represents nine types of  
 234 mutations such as Missense\_Mutation, Nonsense\_Mutation, Splice\_Site,  
 235 Translational\_Start\_Site, Frame\_Shift\_Ins, Frame\_Shift\_Del, In\_Frame\_Ins, In\_Frame\_Del,  
 236 and Nonstop\_Mutations, while MuSE and SomaticSniper MAF files consist  
 237 Missense\_Mutation, Nonsense\_Mutation, Splice\_Site, Translational\_Start\_Site,  
 238 Nonstop\_Mutations. The SNV class visualizes the single-nucleotide variants in the TCGA  
 239 cohort, we observed that all the methods present diverse distribution of SNV as shown in  
 240 (Figure 2). Oncoplots generated by the Maftools visualization module illustrating the somatic  
 241 landscape of the cancer patients for Varscan2, MuTect2, MuSE and SomaticSniper MAF  
 242 files. In Figure 3, we display the topmost mutated genes with their mutation percentage  
 243 ( $\geq 5\%$ ) in total number of samples. From the results we observed that, TP53 is highly  
 244 mutated gene and have almost 20% or  $>20\%$  mutations among different techniques.

245

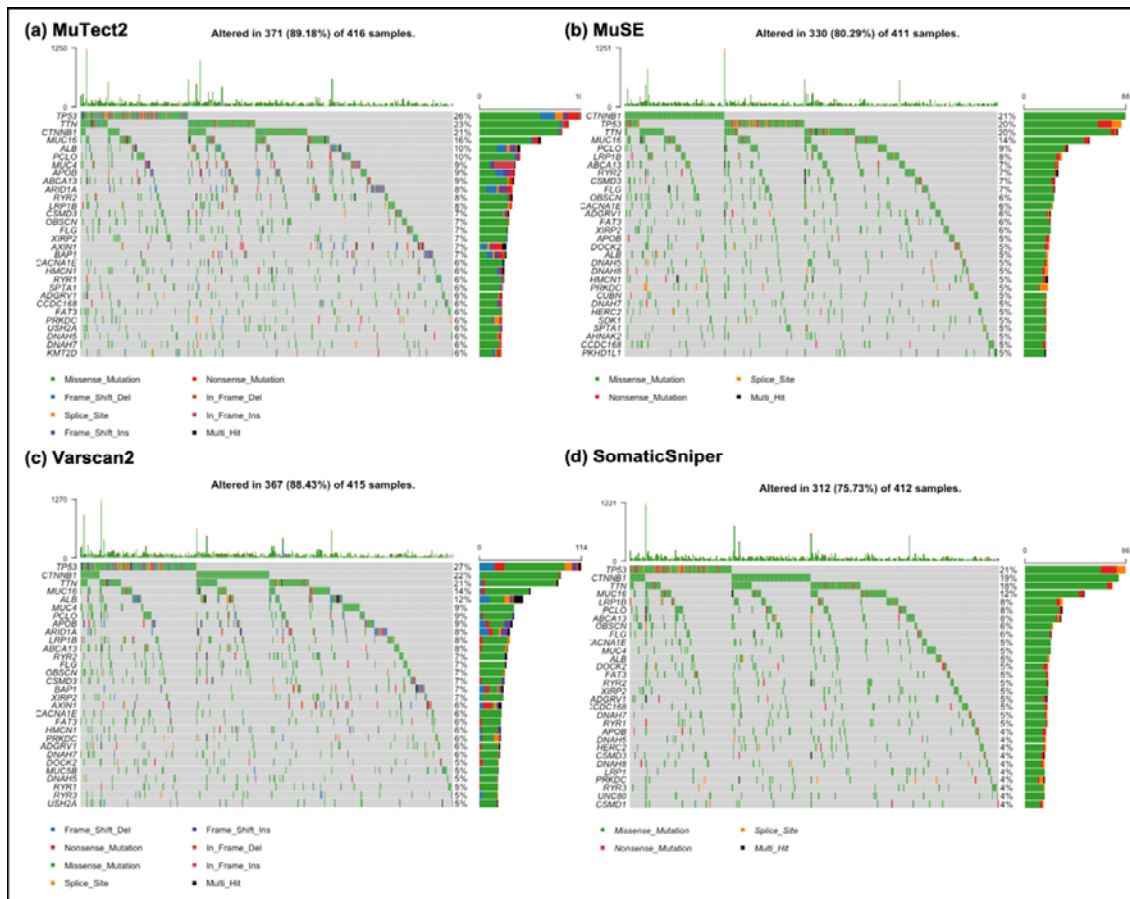

246

247

**Figure 3: Oncoplot visualization of mutation frequency of top-most mutated genes. The rows represented the genes with % mutations, and columns display the samples. (a) Illustrates the oncoplot of MuTect2 technique and indicates that 89.18% of samples having mutated genes (b) Illustrates the oncoplot of MuSE technique and shows that 80.29% of samples having mutated genes (c) Presents the oncoplot of Varscan2 approach and shows that 88.43% of samples having mutated genes (d) Illustrates the oncoplot of SomaticSniper technique and indicates that 75.73% of samples having alerted/mutated genes**

254

### 255 Correlation Analysis

256

By implementing the correlation test we ranked the genes and choose top-10 genes having significant negative-correlation coefficients. The procedure is repeated for all the four techniques from MAF and VCF files of liver cancer patients, which lead to 80 genes in total. The complete correlation analysis is provided in Supplementary Table S1.

260

### 261 Prognostic Biomarkers for High-Risk Prediction

262

#### Single gene

263 Univariate survival analysis was performed using cox-proportional hazard model. We have  
 264 calculated the HR and p-value for ten genes from each technique for VCF files.  
 265 SomaticSniper technique has achieved the maximum HR value in single gene based analysis  
 266 with  $HR_{CLDN20} = 7.06$  and p-value  $6.62E-07$ , followed by Varscan2 with  $HR_{FAM160A2} = 6.81$   
 267 and p-value  $4.01E-05$ , followed by MuTect2 based VCF file with  $HR_{SNHG10} = 5.49$  and p-  
 268 value  $3.94E-06$ , and Muse technique has achieved the  $HR_{CLMP}$  of 3.01 with p-value  $1.67E-05$   
 269 as shown in Table 2.

270

271 **Table 2: Hazards ratio for top-10 genes from VCF files derived using MuTect2, MuSE,**  
 272 **Varscan2, and SomaticSniper technique**

| MuTect2      |      |          |              |         | MuSE            |      |          |             |         |
|--------------|------|----------|--------------|---------|-----------------|------|----------|-------------|---------|
| Gene         | HR   | P-value  | 95% CI       | C-index | Gene            | HR   | P-value  | 95% CI      | C-index |
| SNHG10       | 5.49 | 3.94E-06 | 2.66 - 11.31 | 0.53    | CLMP            | 3.01 | 1.67E-05 | 1.82 - 4.97 | 0.54    |
| WIZ          | 2.69 | 9.71E-07 | 1.81 - 4.00  | 0.56    | BIRC6           | 2.80 | 4.46E-04 | 1.58 - 4.99 | 0.54    |
| MGAT4EP      | 2.49 | 4.46E-04 | 1.50 - 4.15  | 0.54    | LINC02210-CRHR1 | 2.03 | 6.42E-03 | 1.22 - 3.39 | 0.53    |
| LINC00304    | 2.39 | 7.40E-05 | 1.55 - 3.67  | 0.55    | DHX8            | 2.00 | 2.90E-02 | 1.07 - 3.74 | 0.52    |
| CACNG7       | 1.93 | 5.72E-04 | 1.33 - 2.81  | 0.56    | LINC00972       | 1.91 | 9.31E-03 | 1.17 - 3.10 | 0.54    |
| OR52B6       | 1.83 | 1.12E-03 | 1.27 - 2.63  | 0.56    | PAX7            | 1.90 | 8.29E-04 | 1.30 - 2.76 | 0.56    |
| TYK2         | 1.80 | 2.21E-03 | 1.24 - 2.63  | 0.56    | TAS1R2          | 1.61 | 2.63E-02 | 1.06 - 2.44 | 0.53    |
| PIGO         | 1.79 | 1.66E-02 | 1.11 - 2.88  | 0.52    | SNTG1           | 1.53 | 3.37E-02 | 1.03 - 2.27 | 0.54    |
| S100A12      | 1.71 | 1.10E-02 | 1.13 - 2.59  | 0.54    | CNTN5           | 1.34 | 2.25E-01 | 0.83 - 2.16 | 0.51    |
| DNAJC9-AS1   | 1.08 | 6.51E-01 | 0.77 - 1.51  | 0.52    | ZNF521          | 1.26 | 2.63E-01 | 0.84 - 1.91 | 0.52    |
| Varscan2     |      |          |              |         | SomaticSniper   |      |          |             |         |
| Gene         | HR   | P-value  | 95% CI       | C-index | Gene            | HR   | P-value  | 95% CI      | C-index |
| FAM160A2     | 6.81 | 4.01E-05 | 2.73 - 17.02 | 0.52    | CLDN20          | 7.06 | 6.62E-07 | 3.27 - 15.2 | 0.53    |
| LOC100420587 | 5.45 | 1.31E-07 | 2.90 - 10.22 | 0.54    | NR2C2AP         | 5.17 | 3.16E-05 | 2.38 - 11.2 | 0.52    |
| SPDYA        | 3.08 | 7.70E-04 | 1.60 - 5.94  | 0.53    | ATG9B           | 3.34 | 2.59E-04 | 1.75 - 6.37 | 0.53    |
| BRSK2        | 2.55 | 1.01E-03 | 1.46 - 4.46  | 0.54    | HAUS5           | 2.79 | 2.22E-05 | 1.74 - 4.48 | 0.55    |
| ADGRF4       | 2.21 | 1.23E-02 | 1.19 - 4.10  | 0.53    | LOC100287329    | 2.58 | 8.23E-04 | 1.48 - 4.49 | 0.53    |
| LINC00972    | 2.11 | 2.18E-03 | 1.31 - 3.41  | 0.55    | P4HTM           | 2.18 | 2.43E-02 | 1.11 - 4.31 | 0.52    |
| TM4SF18      | 2.07 | 1.40E-02 | 1.16 - 3.70  | 0.53    | OR6C76          | 2.12 | 1.18E-03 | 1.35 - 3.35 | 0.54    |
| OR5AS1       | 1.86 | 1.43E-02 | 1.13 - 3.06  | 0.54    | CLK2            | 1.94 | 3.58E-02 | 1.05 - 3.61 | 0.52    |
| PDE11A       | 1.72 | 2.74E-03 | 1.21 - 2.46  | 0.55    | FAM187B         | 1.64 | 1.51E-02 | 1.10 - 2.43 | 0.55    |
| LOC101929073 | 1.29 | 2.98E-01 | 0.80 - 2.11  | 0.52    | NOMO3           | 1.34 | 1.45E-01 | 0.90 - 1.98 | 0.52    |

273

HR: Hazard ratio; 95% CI: 95% Confidence Interval; C-index: Concordance index

274

275 Similar analysis was done for MAF files from each technique and HR values were calculated.

276 As exhibited in Table 3, Mutect2 technique based MAF file has achieved the maximum

277  $HR_{LAMC3} = 9.25$  with p-value  $1.78E-06$ , followed by Varscan2 with  $HR_{SYDE1} = 8.46$  and  $3.71E-$   
 278  $05$ , followed by MuSE technique with  $HR_{ITGB8} = 8.30$  and p-value  $5.69E-07$ , then followed by  
 279 SomaticSniper with  $HR_{CAD} = 5.56$  and p-value  $8.10E-04$ .

280

281 **Table 3: Hazards ratio for top-10 genes from MAF files derived using MuTect2, MuSE,**  
 282 **Varscan2, and SomaticSniper technique**

| MuTect2  |      |          |              |         | MuSE          |      |          |              |         |
|----------|------|----------|--------------|---------|---------------|------|----------|--------------|---------|
| Gene     | HR   | P-value  | 95% CI       | C-index | Gene          | HR   | P-value  | 95% CI       | C-index |
| LAMC3    | 9.25 | 1.78E-06 | 3.71 - 23.05 | 0.52    | ITGB8         | 8.37 | 5.69E-07 | 3.64 - 19.24 | 0.52    |
| EVC2     | 4.30 | 8.66E-05 | 2.08 - 8.91  | 0.53    | TBX3          | 8.10 | 6.06E-05 | 2.91 - 22.53 | 0.52    |
| NYNRIN   | 3.94 | 1.22E-03 | 1.72 - 9.05  | 0.52    | SIPA1L3       | 4.90 | 5.54E-05 | 2.26 - 10.61 | 0.52    |
| KIAA2026 | 3.85 | 1.49E-03 | 1.68 - 8.86  | 0.52    | CAD           | 4.45 | 3.58E-03 | 1.63 - 12.14 | 0.52    |
| SUPT20H  | 3.41 | 7.53E-03 | 1.39 - 8.40  | 0.51    | EVC2          | 4.16 | 2.97E-04 | 1.92 - 9.01  | 0.52    |
| BRINP2   | 2.83 | 2.43E-02 | 1.14 - 6.98  | 0.52    | ARHGEF11      | 3.17 | 2.37E-02 | 1.17 - 8.64  | 0.51    |
| LRP1B    | 1.93 | 7.81E-03 | 1.19 - 3.14  | 0.54    | BRINP2        | 2.80 | 2.56E-02 | 1.13 - 6.92  | 0.52    |
| TP53     | 1.48 | 3.60E-02 | 1.03 - 2.14  | 0.55    | PCDH15        | 1.72 | 1.20E-01 | 0.87 - 3.39  | 0.51    |
| TG       | 1.46 | 4.53E-01 | 0.54 - 3.97  | 0.51    | TG            | 1.46 | 4.55E-01 | 0.54 - 3.97  | 0.51    |
| PCDH15   | 1.43 | 3.30E-01 | 0.70 - 2.93  | 0.51    | CSMD3         | 1.24 | 4.54E-01 | 0.71 - 2.15  | 0.51    |
| Varscan2 |      |          |              |         | SomaticSniper |      |          |              |         |
| Gene     | HR   | P-value  | 95% CI       | C-index | Gene          | HR   | P-value  | 95% CI       | C-index |
| SYDE1    | 8.46 | 3.71E-05 | 3.07 - 23.35 | 0.52    | CAD           | 5.56 | 8.10E-04 | 2.04 - 15.17 | 0.52    |
| ALPP     | 4.33 | 1.44E-03 | 1.76 - 10.66 | 0.52    | TOP2A         | 4.63 | 2.73E-03 | 1.70 - 12.62 | 0.52    |
| KIAA2026 | 3.85 | 1.49E-03 | 1.68 - 8.86  | 0.52    | KIAA2026      | 4.01 | 2.62E-03 | 1.62 - 9.93  | 0.52    |
| CAD      | 3.32 | 1.91E-02 | 1.22 - 9.04  | 0.51    | EVC2          | 4.00 | 1.04E-03 | 1.75 - 9.17  | 0.52    |
| BRINP2   | 2.83 | 2.43E-02 | 1.14 - 6.98  | 0.52    | KTN1          | 2.56 | 1.09E-01 | 0.81 - 8.10  | 0.51    |
| TP53     | 1.60 | 9.85E-03 | 1.12 - 2.30  | 0.56    | EPHA3         | 2.25 | 1.67E-01 | 0.71 - 7.13  | 0.51    |
| PCDH15   | 1.48 | 2.81E-01 | 0.72 - 3.05  | 0.51    | KIF26B        | 2.03 | 1.66E-01 | 0.74 - 5.55  | 0.51    |
| TG       | 1.46 | 4.53E-01 | 0.54 - 3.97  | 0.51    | PCDH15        | 1.76 | 1.78E-01 | 0.77 - 4.02  | 0.51    |
| PLCB1    | 1.25 | 7.00E-01 | 0.40 - 3.96  | 0.50    | TP53          | 1.63 | 1.20E-02 | 1.11 - 2.38  | 0.55    |
| XIRP2    | 1.11 | 7.55E-01 | 0.58 - 2.12  | 0.51    | TG            | 1.18 | 8.17E-01 | 0.29 - 4.79  | 0.50    |

283 **HR: Hazard ratio; 95% CI: 95% Confidence Interval; C-index: Concordance index**

284

### 285 Multiple Gene

286 In order to explore the effect of mutations in all the selected genes altogether, we have  
 287 predicted the survival time to estimate the high-risk group in liver cancer patients. Using the  
 288 predicted OS time, HR and p-value was computed with cox proportional hazard models for  
 289 each technique corresponds to each file type. We achieved highest HR 4.50 with highly  
 290 significant p-value  $3.83E-15$  for the VCF files generated using the MuTect2 technique

291 (Figure 4A). However, in case of MAF files, MuSE technique performed best among other  
 292 techniques with HR 2.47 and p-value 9.64E-07 (Figure 4B). Additionally, KM survival plots  
 293 clearly represents the segregation of high- and low-risk groups; the comparison of different  
 294 mutation calling techniques based on two file formats is shown in Figure 4.  
 295

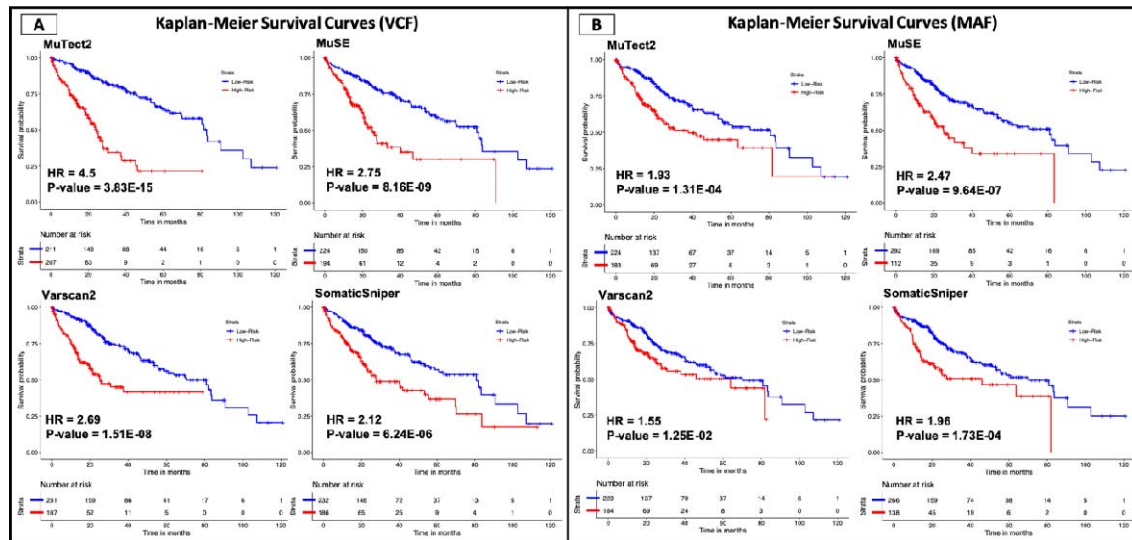

296  
 297 **Figure 4: Kaplan Meier survival curves for the risk estimation of liver cancer patients based on the**  
 298 **combined effect of mutation (A) survival plots for the VCF files (B) survival plots for the**  
 299 **MAF files**

300

### 301 Prediction of Overall Survival of Patients

302 To predict the overall survival for liver cancer patients, we have used number of mutations in  
 303 the top-10 genes as the input feature and developed regression models for VCF and MAF  
 304 files for each technique, using seven different regressors such as, Linear (LR), Lasso (LAS),  
 305 Ridge (RID), Elastic Net (ENT), Decision Tree (DTR), Random Forest (RFR), and Support  
 306 Vector (SVR). Table 4 exhibits the performance of best performing regressor in each file  
 307 type. Performance of all the regressors for each file type and technique is reported in  
 308 Supplementary Table S2. In case of MuTect2 technique, the OS predicted using VCF files  
 309 have MAE 12.52 and significant correlation of 0.57 between the true and predicted OS;  
 310 whereas in MAF file the MAE is 16.47 with R 0.37. Whereas, MuSE technique has achieved  
 311 the minimum MAE of 13.88 and 16.89 along with R of 0.51 and 0.34, for VCF and MAF file  
 312 respectively. In files generated using Varscan2 technique, for VCF file the minimum MAE is  
 313 14.57 with R 0.48, whereas for MAF file it is 16.53 with R 0.36. VCF and MAF file  
 314 generated using SomaticSniper technique reported minimum MAE of 15.76 (R=0.40) and

315 16.72 (R=0.33), respectively. As shown in Table 4, for VCF as well as MAF files, MuTect2  
 316 technique outperformed the other techniques in terms of MAE, RMSE and R-value.

317

318 **Table 4: Performance of best regressors on top-10 genes from VCF and MAF files**

319 **extracted using all techniques**

| Technique            | File Type | MAE   | RMSE  | R    | p-value  |
|----------------------|-----------|-------|-------|------|----------|
| <b>MuTect2</b>       | VCF       | 12.52 | 19.58 | 0.57 | 7.00E-37 |
|                      | MAF       | 16.47 | 22.16 | 0.37 | 1.31E-14 |
| <b>MuSE</b>          | VCF       | 13.88 | 20.38 | 0.51 | 1.38E-29 |
|                      | MAF       | 16.89 | 22.48 | 0.34 | 1.68E-12 |
| <b>Varscan2</b>      | VCF       | 14.57 | 20.78 | 0.48 | 4.77E-26 |
|                      | MAF       | 16.53 | 22.26 | 0.36 | 9.11E-14 |
| <b>SomaticSniper</b> | VCF       | 15.76 | 21.82 | 0.40 | 3.31E-17 |
|                      | MAF       | 16.72 | 22.26 | 0.33 | 8.46E-12 |

320 MAE: Mean Absolute Error; RMSE: Root Mean Square Error; HR: Hazard Ratio; R: Correlation Coefficient

321

### 322 **Discrimination of Low- and High-Risk patients**

323 Initially, the dataset was divided into two groups, i.e., the high-risk and low-risk group based  
 324 on the median OS. Samples with OS time less than the median OS time were designated to  
 325 the high-risk group, whereas the remaining were assigned to the low-risk group. To assess the  
 326 ability of the number of mutations/gene/samples to classify the patients into the high and  
 327 low-risk groups, classification models were developed on top 10 genes for each technique  
 328 and file type, using eight different classifiers such as RF, LR, XGB, DT, KNN, GNB, ET and  
 329 SVC. The performance of all the classifiers for every model generated on each technique for  
 330 both the files are reported in Supplementary Table S3.

331 Number of mutations reported through each technique were used to develop models to  
 332 predict the high- and low-risk group. In case of VCF file derived using Mutect2, SVC-based  
 333 model achieved AUROC of 0.72 and 0.69 in training and validation data, respectively as  
 334 shown in Table 5. Similarly, ET-based model developed on genes from MAF files extracted  
 335 using MuTect2 technique performed with AUROC of 0.57 and 0.67 on training and  
 336 validation dataset, respectively. For MuSE technique, GNB-based model developed on genes  
 337 from VCF files achieved AUROC of 0.66 and 0.68 on training and validation data whereas,  
 338 ET-based model developed on genes from MAF files achieved 0.60 and 0.51 AUROC on  
 339 training and validation dataset, respectively. For the genes obtained from the Varscan2  
 340 technique, SVC-based model with genes from VCF file performed best with AUROC 0.68  
 341 and 0.64 on the training and validation dataset, with the minimum difference in sensitivity  
 342 and specificity, whereas for MAF files, LR-based model achieved AUROC of 0.63 and 0.63

343 on training and validation dataset. For SomaticSniper technique, LR-based model developed  
 344 on genes from VCF files achieved AUROC of 0.63 and 0.65 on training and validation data  
 345 whereas, LR-based model developed on genes from MAF files achieved 0.60 and 0.64  
 346 AUROC on training and validation dataset, respectively. For VCF as well as MAF files,  
 347 MuTect2 technique performed best among other techniques in terms of difference between  
 348 sensitivity and specificity as well as AUROC.

349

350 **Table 5: Performance of best classifiers on top-10 genes from VCF and MAF files**  
 351 **extracted using all techniques**

| Technique     | File Type | Dataset    | MLT | Sensitivity | Specificity | Accuracy | AUROC | F1   | Kappa | MCC  |
|---------------|-----------|------------|-----|-------------|-------------|----------|-------|------|-------|------|
| MuTect2       | VCF       | Training   | SVC | 70.06       | 71.86       | 71.26    | 0.72  | 0.71 | 0.41  | 0.42 |
|               |           | Validation |     | 69.05       | 66.67       | 67.86    | 0.69  | 0.68 | 0.36  | 0.36 |
|               | MAF       | Training   | ET  | 58.03       | 52.76       | 55.39    | 0.57  | 0.57 | 0.11  | 0.11 |
|               |           | Validation |     | 60.98       | 63.42       | 62.20    | 0.67  | 0.62 | 0.24  | 0.24 |
| MuSE          | VCF       | Training   | GNB | 63.47       | 64.07       | 63.77    | 0.66  | 0.64 | 0.28  | 0.28 |
|               |           | Validation |     | 71.43       | 52.38       | 61.91    | 0.68  | 0.65 | 0.24  | 0.24 |
|               | MAF       | Training   | ET  | 58.03       | 53.42       | 55.73    | 0.60  | 0.57 | 0.11  | 0.12 |
|               |           | Validation |     | 30.00       | 75.61       | 53.09    | 0.51  | 0.39 | 0.06  | 0.06 |
| Varscan2      | VCF       | Training   | SVC | 62.28       | 70.66       | 66.47    | 0.68  | 0.65 | 0.33  | 0.33 |
|               |           | Validation |     | 71.43       | 61.91       | 66.67    | 0.64  | 0.68 | 0.33  | 0.34 |
|               | MAF       | Training   | LR  | 57.41       | 63.80       | 60.62    | 0.63  | 0.59 | 0.21  | 0.21 |
|               |           | Validation |     | 48.78       | 78.05       | 63.42    | 0.63  | 0.57 | 0.27  | 0.28 |
| SomaticSniper | VCF       | Training   | LR  | 60.48       | 61.08       | 60.78    | 0.63  | 0.61 | 0.22  | 0.22 |
|               |           | Validation |     | 52.38       | 76.19       | 64.29    | 0.65  | 0.60 | 0.29  | 0.29 |
|               | MAF       | Training   | LR  | 54.94       | 61.49       | 58.20    | 0.60  | 0.57 | 0.16  | 0.17 |
|               |           | Validation |     | 45.00       | 80.49       | 62.96    | 0.64  | 0.55 | 0.26  | 0.27 |

352 **MLT: Machine Learning Technique; LR: Logistic Regression; ET: ExtraTree; DT: Decision Tree; XGB: eXtreme Gradient Boosting; RF:**  
 353 **Random Forest**

354

## 355 Discussion

356 Liver cancer is a global problem and occurs after severe liver diseases [31]. Chronic liver  
 357 diseases are associated with cancer development and prompt progressive mutations at the  
 358 genomic level [32, 33]. Previous studies report that liver cancer is associated with poor  
 359 prognosis and a high mortality rate amongst the most frequent cancer types [34, 35].  
 360 Nowadays, several mutation calling techniques are available to identify the mutation  
 361 landscape in tumor/normal patients. Hitherto, there is not an appropriate comparison of  
 362 mutation detection methods for the predictive and prognostic analysis. In this study, we  
 363 examine the performance of four widely used mutation calling techniques such as MuTect2,



364 MuSE, VarScan2, and SomaticSniper using TCGA liver cancer cohort. We have applied  
365 various techniques in order to compare all the methods for predicting and analysing  
366 prognostic biomarkers in liver cancer patients. First, we have used VCF and MAF files  
367 generated by the different mutation calling methods. We have used the most popular methods  
368 (ANNOVAR and Maftools) to identify the gene-associated mutations in liver cancer samples.  
369 Further, we observed that the VCF files of Mutect2 and SomaticSniper report highest number  
370 of mutated genes and cover over 5 million mutations. Whereas, MAF files reports  
371 comparatively less mutated genes for each technique as shown in Table 1.

372 Then, we performed correlation analysis in order to understand the impact of mutations on  
373 the survival of liver cancer patients. On performing the univariate survival analysis on VCF  
374 files, we observed that LncRNA SNGH10, CLMP, FAM160A2 and CLDN20 achieved the  
375 highest HR value in MuTect2, MuSE, VarScan2 and SomaticSniper technique respectively.  
376 As shown by Lan et al. LncRNA SNGH10 is an oncogenic lncRNA in liver cancer patients  
377 and reduces the survival of the patients [36]. It's down-regulation is also associated with the  
378 poor survival non-small cell lung cancer with HR 2.09 with p-value 0.02 [37]. Our study also  
379 corresponds with the previous studies and exhibits that the mutations in SNGH10 gene is  
380 associated with poor outcome in liver cancer patients with HR 5.49 and p-value 3.94E-06.  
381 Whereas, the differential expression of CLMP gene is associated with the progression of  
382 cancers of the breast cancer [38]. Yang et al. also reported the significance of CLDN20 gene  
383 in the survival of breast cancer patients with HR 1.38 and p-value 0.047 [39]. However, our  
384 analysis reveal the role of CLMP and CLDN20 gene in the survival of liver cancer patients.  
385 Further, in case of MAF files, the univariate survival analysis reveals that SYDE1, LAMC3,  
386 ITGB8, CAD, EVC2, NYNRIN, BRSK2, TP53 genes significantly reduces the overall  
387 survival. As shown by the recent study that SYDE1 act as an oncogene and overexpressed in  
388 glioma patients makes it an important diagnostic and prognostic biomarker [40]. Moreover,  
389 the down-regulation of LAMC3 is correlated with the poor prognosis and metastasis in the  
390 ovarian cancer patients [41]. A study also reveals that mutations associated with LAMC3  
391 genes may cause PNH (a rare disorder of clonal stem cell in foetus), which may leads high  
392 mortality rate infection and premature birth [42, 43]. We also observed that mutations  
393 associated with LAMC3 significantly reduces the survival of patients with HR = 9.25 and p-  
394 value 1.78E-06. In addition, ITGB8 is shown to be highly upregulated in high-grade ovarian  
395 cancer patients, which leads to shorter OS with significant HR 1.42 [44]. Paul et.al, also  
396 reveals that EVC2 gene is highly mutated in breast cancer patients and dysregulates pathways  
397 like (mTOR, CDK/RB, cAMP/PKA, WNT, etc) [45]. Our study show that mutations

398 associated with EVC2 genes reduces the overall survival of patients with HR = 4.3 and p-  
399 value 8.66E-05. Researchers have shown that the overexpression of BRSK2 gene correlated  
400 with the patients survival and prognosis in pancreatic cancer [46]. Of Note, several studies  
401 reports that TP53 is the highly mutated gene among most of the human cancers and affects  
402 the survival of cancer patients [47-51]. In current study, we also found that TP53 is the highly  
403 mutated gene among the liver cancer patients and covers almost 20% mutations. Correlation  
404 and survival analysis shown that mutation associated with TP53 significantly reduces the  
405 overall survival with HR = 1.63 and p-value 1.20E-02 among liver cancer patients. While  
406 considering the combined effect of selected genes in each file, MuTect2 technique  
407 outperformed all the other techniques in VCF file with HR 4.50 (p-value 3.83E-15), whereas  
408 MuSE technique outperformed other mutation calling methods with HR 2.47 (p-value 9.64E-  
409 07) in case of MAF files (Figure 4).

410 Furthermore, to compare the different mutation calling techniques we develop various  
411 survival prediction and classification models using the top-10 genes respective to each file  
412 type (Table 4 and 5). The predicted survival time employed for the stratification of high-risk  
413 and low-risk groups. Models based on ten selected genes from VCF file of MuTect2  
414 technique performed best among the other techniques in stratification of patients in high- and  
415 low- risk group, as well as in OS time prediction. Our findings suggest that the VCF file  
416 generated using MuTect2 mutation calling technique provides the comprehensive information  
417 which can be used for the risk-estimation of liver cancer cohort. Furthermore, this needs to be  
418 confirmed on the other cancer cohorts to explore the prognostic potential of mutations.

419

## 420 **Declarations**

## 421 **Funding**

422 The current work has not received any specific grant from any funding agencies.

## 423 **Conflict of Interests**

424 The authors declare no competing financial and non-financial interests.

## 425 **Ethics Approval**

426 Not applicable

## 427 **Consent to participate**

428 Not applicable

#### 429 **Conflict of Publication**

430 Not applicable

#### 431 **Acknowledgements**

432 Authors are thankful to the Department of Computational Biology, IIT-Delhi for  
433 infrastructure, Department of Biotechnology (DBT), Department of Science and Technology  
434 (DST-INSPIRE) for financial support and fellowships.

#### 435 **Author contribution**

436 SP, AD, and GPSR collected and processed the datasets. SP, AD, and GPSR implemented the  
437 algorithms. SP, AD, and GPSR developed the prediction models. SP, AD, and GPSR  
438 analyzed the results. SP, AD, and GPSR penned the manuscript. GPSR conceived and  
439 coordinated the project and provided overall supervision to the project. All authors have read  
440 and approved the final manuscript.

#### 441 **References**

- 442 1. Sung H, Ferlay J, Siegel RL et al. Global Cancer Statistics 2020: GLOBOCAN  
443 Estimates of Incidence and Mortality Worldwide for 36 Cancers in 185 Countries, CA  
444 Cancer J Clin 2021;71:209-249.
- 445 2. Gerlinger M, Rowan AJ, Horswell S et al. Intratumor heterogeneity and branched  
446 evolution revealed by multiregion sequencing, N Engl J Med 2012;366:883-892.
- 447 3. Taylor SS. Protein kinases: a diverse family of related proteins, Bioessays 1987;7:24-  
448 29.
- 449 4. Flaherty KT, Puzanov I, Kim KB et al. Inhibition of mutated, activated BRAF in  
450 metastatic melanoma, N Engl J Med 2010;363:809-819.
- 451 5. Lynch TJ, Bell DW, Sordella R et al. Activating mutations in the epidermal growth  
452 factor receptor underlying responsiveness of non-small-cell lung cancer to gefitinib, N Engl J  
453 Med 2004;350:2129-2139.
- 454 6. Hirsch FR, Scagliotti GV, Mulshine JL et al. Lung cancer: current therapies and new  
455 targeted treatments, Lancet 2017;389:299-311.

- 456 7. Audeh MW, Carmichael J, Penson RT et al. Oral poly(ADP-ribose) polymerase  
457 inhibitor olaparib in patients with BRCA1 or BRCA2 mutations and recurrent ovarian cancer:  
458 a proof-of-concept trial, *Lancet* 2010;376:245-251.
- 459 8. LaDuca H, Farwell KD, Vuong H et al. Exome sequencing covers >98% of mutations  
460 identified on targeted next generation sequencing panels, *PLoS One* 2017;12:e0170843.
- 461 9. Lelieveld SH, Spielmann M, Mundlos S et al. Comparison of Exome and Genome  
462 Sequencing Technologies for the Complete Capture of Protein-Coding Regions, *Hum Mutat*  
463 2015;36:815-822.
- 464 10. Hartley T, Wagner JD, Warman-Chardon J et al. Whole-exome sequencing is a  
465 valuable diagnostic tool for inherited peripheral neuropathies: Outcomes from a cohort of 50  
466 families, *Clin Genet* 2018;93:301-309.
- 467 11. Koboldt DC, Zhang Q, Larson DE et al. VarScan 2: somatic mutation and copy  
468 number alteration discovery in cancer by exome sequencing, *Genome Res* 2012;22:568-576.
- 469 12. Kim S, Scheffler K, Halpern AL et al. Strelka2: fast and accurate calling of germline  
470 and somatic variants, *Nat Methods* 2018;15:591-594.
- 471 13. Alioto TS, Buchhalter I, Derdak S et al. A comprehensive assessment of somatic  
472 mutation detection in cancer using whole-genome sequencing, *Nat Commun* 2015;6:10001.
- 473 14. do Valle IF, Giampieri E, Simonetti G et al. Optimized pipeline of MuTect and  
474 GATK tools to improve the detection of somatic single nucleotide polymorphisms in whole-  
475 exome sequencing data, *BMC Bioinformatics* 2016;17:341.
- 476 15. Cibulskis K, Lawrence MS, Carter SL et al. Sensitive detection of somatic point  
477 mutations in impure and heterogeneous cancer samples, *Nat Biotechnol* 2013;31:213-219.
- 478 16. Fan Y, Xi L, Hughes DS et al. MuSE: accounting for tumor heterogeneity using a  
479 sample-specific error model improves sensitivity and specificity in mutation calling from  
480 sequencing data, *Genome Biol* 2016;17:178.
- 481 17. Larson DE, Harris CC, Chen K et al. SomaticSniper: identification of somatic point  
482 mutations in whole genome sequencing data, *Bioinformatics* 2012;28:311-317.
- 483 18. Revathidevi S, Munirajan AK. Akt in cancer: Mediator and more, *Semin Cancer Biol*  
484 2019;59:80-91.
- 485 19. Wang K, Li M, Hakonarson H. ANNOVAR: functional annotation of genetic variants  
486 from high-throughput sequencing data, *Nucleic Acids Res* 2010;38:e164.
- 487 20. Mayakonda A, Lin DC, Assenov Y et al. Maftools: efficient and comprehensive  
488 analysis of somatic variants in cancer, *Genome Res* 2018;28:1747-1756.

- 489 21. Grossman RL, Heath AP, Ferretti V et al. Toward a Shared Vision for Cancer  
490 Genomic Data, *N Engl J Med* 2016;375:1109-1112.
- 491 22. Wei L, Jin Z, Yang S et al. TCGA-assembler 2: software pipeline for retrieval and  
492 processing of TCGA/CPTAC data, *Bioinformatics* 2018;34:1615-1617.
- 493 23. Goel MK, Khanna P, Kishore J. Understanding survival analysis: Kaplan-Meier  
494 estimate, *Int J Ayurveda Res* 2010;1:274-278.
- 495 24. Pedregosa F, Varoquaux G, Gramfort A et al. Scikit-learn: Machine Learning in  
496 Python, *Journal of Machine Learning Research* 2012;12:2825-2830.
- 497 25. Patiyal S, Agrawal P, Kumar V et al. NAGbinder: An approach for identifying N-  
498 acetylglucosamine interacting residues of a protein from its primary sequence, *Protein Sci*  
499 2020;29:201-210.
- 500 26. Kaur H, Dhall A, Kumar R et al. Identification of Platform-Independent Diagnostic  
501 Biomarker Panel for Hepatocellular Carcinoma Using Large-Scale Transcriptomics Data,  
502 *Front Genet* 2019;10:1306.
- 503 27. Dhall A, Patiyal S, Kaur H et al. Computing Skin Cutaneous Melanoma Outcome  
504 From the HLA-Alleles and Clinical Characteristics, *Front Genet* 2020;11:221.
- 505 28. Bhalla S, Kaur H, Dhall A et al. Prediction and Analysis of Skin Cancer Progression  
506 using Genomics Profiles of Patients, *Sci Rep* 2019;9:15790.
- 507 29. Schemper M. The relative importance of prognostic factors in studies of survival, *Stat*  
508 *Med* 1993;12:2377-2382.
- 509 30. Lex A, Gehlenborg N, Strobel H et al. UpSet: Visualization of Intersecting Sets,  
510 *IEEE Trans Vis Comput Graph* 2014;20:1983-1992.
- 511 31. Davis GL, Dempster J, Meler JD et al. Hepatocellular carcinoma: management of an  
512 increasingly common problem, *Proc (Bayl Univ Med Cent)* 2008;21:266-280.
- 513 32. Muller M, Bird TG, Nault JC. The landscape of gene mutations in cirrhosis and  
514 hepatocellular carcinoma, *J Hepatol* 2020;72:990-1002.
- 515 33. Farazi PA, DePinho RA. Hepatocellular carcinoma pathogenesis: from genes to  
516 environment, *Nat Rev Cancer* 2006;6:674-687.
- 517 34. Lin L, Yan L, Liu Y et al. The Burden and Trends of Primary Liver Cancer Caused by  
518 Specific Etiologies from 1990 to 2017 at the Global, Regional, National, Age, and Sex Level  
519 Results from the Global Burden of Disease Study 2017, *Liver Cancer* 2020;9:563-582.
- 520 35. Balogh J, Victor D, 3rd, Asham EH et al. Hepatocellular carcinoma: a review, *J*  
521 *Hepatocell Carcinoma* 2016;3:41-53.

- 522 36. Lan T, Yuan K, Yan X et al. LncRNA SNHG10 Facilitates Hepatocarcinogenesis and  
523 Metastasis by Modulating Its Homolog SCARNA13 via a Positive Feedback Loop, *Cancer*  
524 *Res* 2019;79:3220-3234.
- 525 37. Liang M, Wang L, Cao C et al. LncRNA SNHG10 is downregulated in non-small cell  
526 lung cancer and predicts poor survival, *BMC Pulm Med* 2020;20:273.
- 527 38. Nilchian A, Johansson J, Ghalali A et al. CXADR-Mediated Formation of an AKT  
528 Inhibitory Signalosome at Tight Junctions Controls Epithelial-Mesenchymal Plasticity in  
529 Breast Cancer, *Cancer Res* 2019;79:47-60.
- 530 39. Yang G, Jian L, Chen Q. Comprehensive analysis of expression and prognostic value  
531 of the claudin family in human breast cancer, *Aging (Albany NY)* 2021;13:8777-8796.
- 532 40. Han Z, Zhuang X, Yang B et al. SYDE1 Acts as an Oncogene in Glioma and has  
533 Diagnostic and Prognostic Values, *Front Mol Biosci* 2021;8:714203.
- 534 41. Lei SM, Liu X, Xia LP et al. [Relationships between decreased LAMC3 and poor  
535 prognosis in ovarian cancer], *Zhonghua Fu Chan Ke Za Zhi* 2021;56:489-497.
- 536 42. De Angelis C, Byrne AB, Morrow R et al. Compound heterozygous variants in  
537 LAMC3 in association with posterior periventricular nodular heterotopia, *BMC Med*  
538 *Genomics* 2021;14:64.
- 539 43. Qian X, Liu X, Zhu Z et al. Variants in LAMC3 Causes Occipital Cortical  
540 Malformation, *Front Genet* 2021;12:616761.
- 541 44. He J, Liu Y, Zhang L et al. Integrin Subunit beta 8 (ITGB8) Upregulation Is an  
542 Independent Predictor of Unfavorable Survival of High-Grade Serous Ovarian Carcinoma  
543 Patients, *Med Sci Monit* 2018;24:8933-8940.
- 544 45. Paul MR, Pan TC, Pant DK et al. Genomic landscape of metastatic breast cancer  
545 identifies preferentially dysregulated pathways and targets, *J Clin Invest* 2020;130:4252-  
546 4265.
- 547 46. W. Lou Dr. GN. BRSK2 expression as a prognosis marker in pancreatic cancer  
548 patients, *Journal of Clinical Oncology* 2009.
- 549 47. Olivier M, Hollstein M, Hainaut P. TP53 mutations in human cancers: origins,  
550 consequences, and clinical use, *Cold Spring Harb Perspect Biol* 2010;2:a001008.
- 551 48. Petitjean A, Achatz MI, Borresen-Dale AL et al. TP53 mutations in human cancers:  
552 functional selection and impact on cancer prognosis and outcomes, *Oncogene* 2007;26:2157-  
553 2165.
- 554 49. Monti P, Menichini P, Speciale A et al. Heterogeneity of TP53 Mutations and P53  
555 Protein Residual Function in Cancer: Does It Matter?, *Front Oncol* 2020;10:593383.

- 556 50. Ungerleider NA, Rao SG, Shahbandi A et al. Breast cancer survival predicted by  
557 TP53 mutation status differs markedly depending on treatment, *Breast Cancer Res*  
558 2018;20:115.
- 559 51. Rosenberg S, Okamura R, Kato S et al. Survival Implications of the Relationship  
560 between Tissue versus Circulating Tumor DNA TP53 Mutations-A Perspective from a Real-  
561 World Precision Medicine Cohort, *Mol Cancer Ther* 2020;19:2612-2620.
- 562
